# Supplementary material
Source: MDPI journal article supplement (https://www.mdpi.com/2227-9717/10/7/1359)
Supplement: s1 [file s1]

# One-step synthesis of high-performance N/S co-doped porous carbon material for environmental remediation

Xiaoyu Huo <sup>1,2</sup>, Chao Jia <sup>2</sup>, Shanshan Shi <sup>1,2</sup>, Tao Teng <sup>2</sup>, Shaojie Zhou <sup>2</sup>, Mingda Hua <sup>2</sup>, Xiangdong Zhu <sup>2,3</sup>, Shicheng Zhang <sup>1,2,\*</sup> and Qunjie Xu <sup>1,\*</sup>

<sup>1</sup> College of Environmental and Chemical Engineering, Shanghai University of Electric Power, Shanghai 200090, China; huoxiaoyu@mail.shiep.edu.cn (X.H.); shanshanshi@mail.shiep.edu.cn (S.S.)

<sup>2</sup> Shanghai Technical Service Platform for Pollution Control and Resource Utilization of Organic Wastes, Shanghai Key Laboratory of Atmospheric Particle Pollution and Prevention (LAP3), Department of Environmental Science and Engineering, Fudan University, Shanghai 200438, China; 20110740026@fudan.edu.cn (C.J.); 2021074076@fudan.edu.cn (T.T.); sjzhou17@fudan.edu.cn (S.Z.); 20210740045@fudan.edu.cn (M.H.); zxdjewett@fudan.edu.cn (X.Z.)

<sup>3</sup> Shanghai Institute of Pollution Control and Ecological Security, Shanghai 200092, China

\* Correspondence: zhangsc@fudan.edu.cn (S.Z.); xuqunjie@shiep.edu.cn (Q.X.)

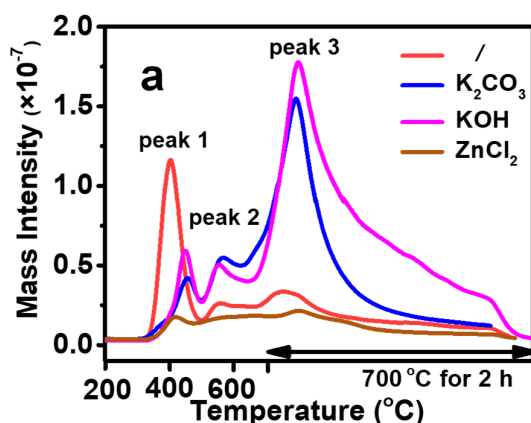

**Figure S1.** (a) Different inorganic activator on the release curves of CO during the preparation process of NSC materials. The activation conditions were set to be 700 °C, and inorganic activator, KSCN and biomass with weight ratio of 1:1:1.

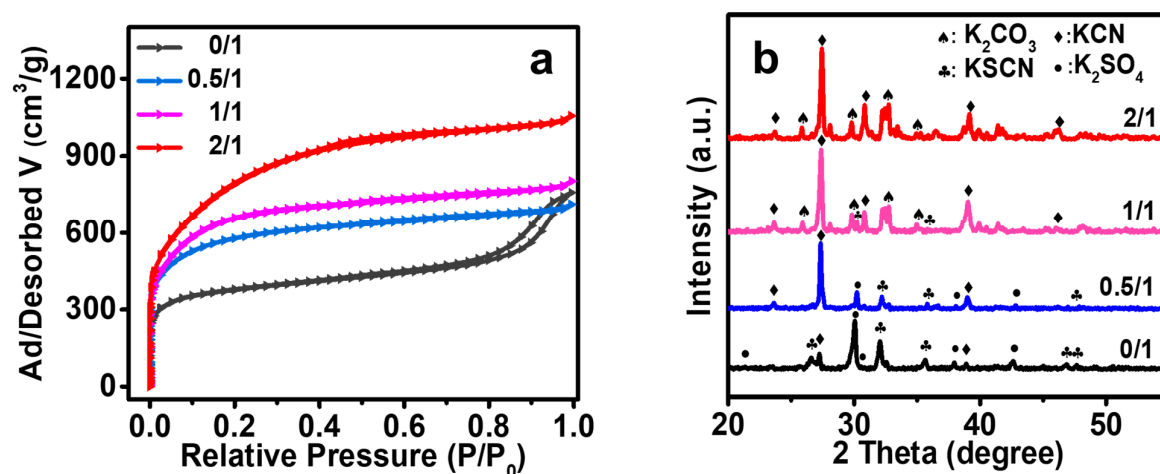

**Figure S2.** (a) N<sub>2</sub> adsorption-desorption isotherms of NSC materials, (b) XRD patterns of the unwashed NSC materials. The activation conditions were set to be 700 °C, KSCN and biomass with mass ratio of 1:1, various mass ratio between K<sub>2</sub>CO<sub>3</sub> and biomass.

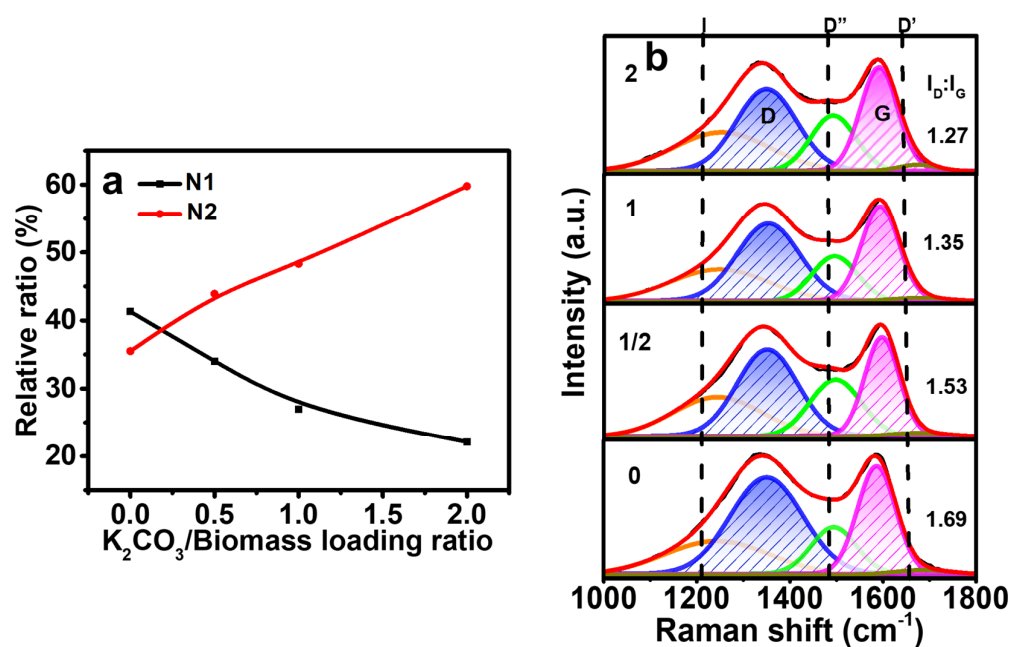

**Figure S3.** (a) Relative ratio of pyridinic N (N1) and pyrrolic N (N2) for NSC materials, (b) Raman spectrum of NSC materials was fitted using the five Gaussian peaks (color lines). The activation conditions were set to be 700 °C, KSCN and biomass with weight ratio of 1:1, various weight ratio between K<sub>2</sub>CO<sub>3</sub> and biomass.

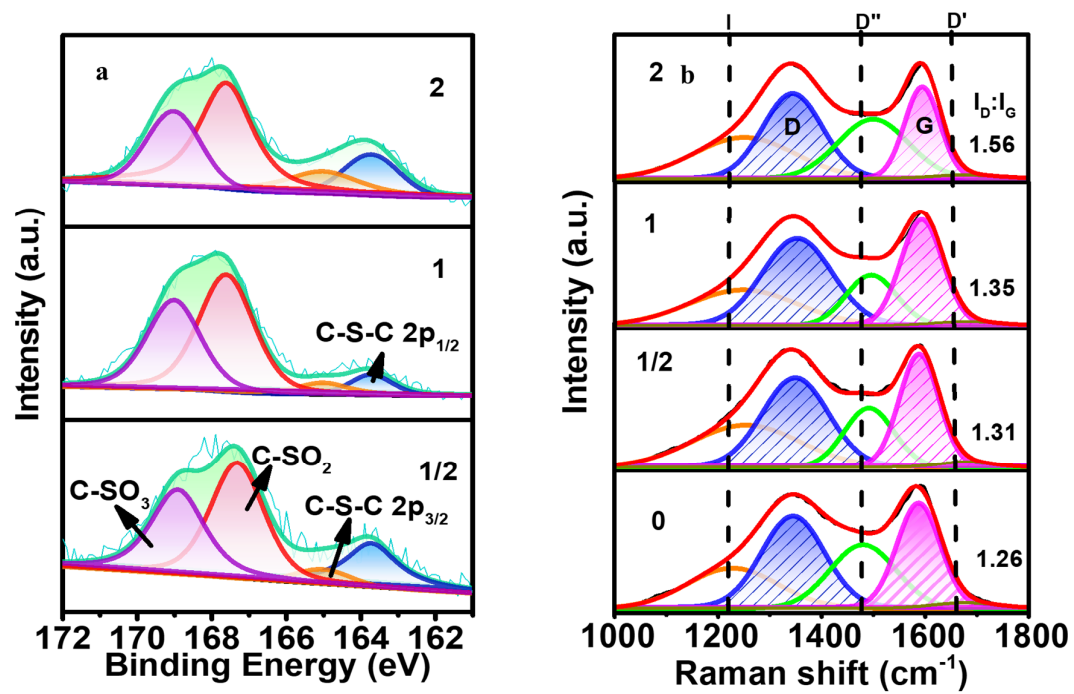

**Figure S4.** (a) S 2p XPS spectra for different KSCN loading content induced NSC materials, (b) Raman spectrum of NSC materials was fitted using the five Gaussian peaks (color lines) The activation conditions were set to be 700 °C, K<sub>2</sub>CO<sub>3</sub> and biomass with weight ratio of 1:1, various weight ratio between KSCN and biomass.

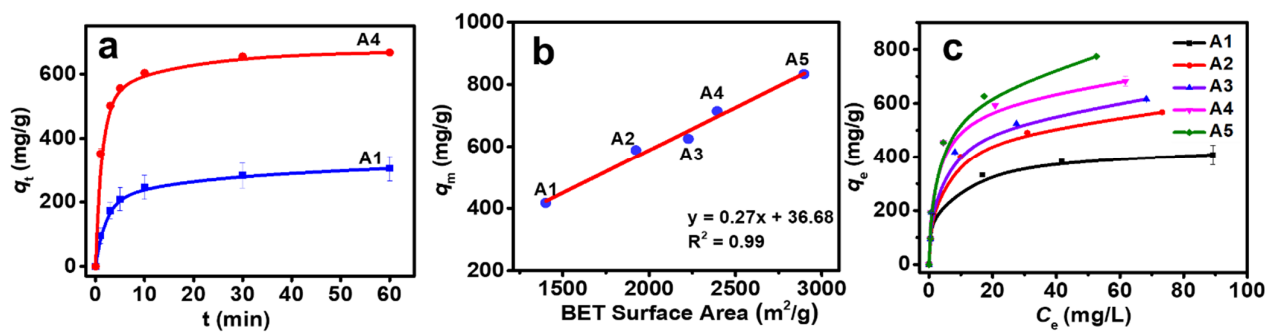

**Figure S5.** (a) Adsorption kinetics of CAP onto selected NSC, (b) Correlations of the resultant NSC between maximum adsorption capacity ( $q_m$ ) and BET surface area, (c) Adsorption isotherms of CAP for selected NSC in aqueous solution (the adsorption isotherms were fitted with the Langmuir model).

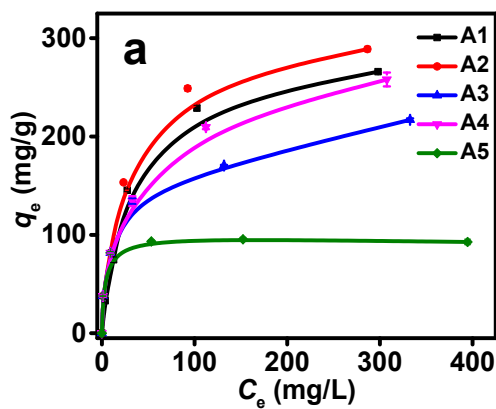

**Figure S6.** (a) Adsorption isotherms of  $Pb^{2+}$  for selected NSC in aqueous solution (the adsorption isotherms were fitted with the Langmuir model).

**Table S1.** Elemental compositions and textural properties of NSC samples. The activation conditions were set to be 700 °C, KSCN and biomass with weight ratio of 1:1, various weight ratio between K<sub>2</sub>CO<sub>3</sub> and biomass.

| m(K <sub>2</sub> CO <sub>3</sub> )<br>/m(biomass) | Yield<br>(%) | C<br>(%) | O<br>(%) | N<br>(%) | S<br>(%) | S <sub>BET</sub> <sup>a</sup><br>(m <sup>2</sup> /g) | S <sub>mic</sub> <sup>b</sup><br>(m <sup>2</sup> /g) | V <sub>T</sub> <sup>c</sup><br>(cm <sup>3</sup> /g) | V <sub>super</sub> <sup>d</sup><br>(cm <sup>3</sup> /g) | V <sub>ultra</sub> <sup>e</sup><br>(cm <sup>3</sup> /g) |
|---------------------------------------------------|--------------|----------|----------|----------|----------|------------------------------------------------------|------------------------------------------------------|-----------------------------------------------------|---------------------------------------------------------|---------------------------------------------------------|
| 0                                                 | 38.7         | 65.7     | 10.03    | 5.03     | 10.01    | 1403                                                 | 1040 (74)                                            | 1.17                                                | 0.29                                                    | 0.18                                                    |
| 0.5                                               | 28.2         | 64.15    | 10.42    | 3.76     | 11.8     | 2113                                                 | 1723 (82)                                            | 1.1                                                 | 0.52                                                    | 0.2                                                     |
| 1                                                 | 26.3         | 71.44    | 9.66     | 2.98     | 9.75     | 2397                                                 | 1970 (82)                                            | 1.24                                                | 0.63                                                    | 0.13                                                    |
| 2                                                 | 17.4         | 81.56    | 5.91     | 2.11     | 4.04     | 2900                                                 | 1820 (63)                                            | 1.63                                                | 0.68                                                    | 0.12                                                    |

<sup>a</sup> BET surface area, <sup>b</sup> micropore surface area, the values in parenthesis was the S<sub>mic</sub> / S<sub>BET</sub> and the unit was %, <sup>c</sup> total pore volume, and <sup>d</sup> supermicropore volume (0.7 nm < pore-size < 2 nm) and <sup>e</sup> ultramicropore volume (< 0.7 nm).

**Table S2.** Elemental compositions and textural properties of NSC samples. The activation conditions were set to be 700 °C, K<sub>2</sub>CO<sub>3</sub> and biomass with weight ratio of 1:1, various weight ratio between KSCN and biomass.

| m(KSCN)<br>/m(biomass) | Yield<br>(%) | C<br>(%) | O<br>(%) | N<br>(%) | S<br>(%) | S <sub>BET</sub> <sup>a</sup><br>(m <sup>2</sup> /g) | S <sub>mic</sub> <sup>b</sup><br>(m <sup>2</sup> /g) | V <sub>T</sub> <sup>c</sup><br>(cm <sup>3</sup> /g) | V <sub>super</sub> <sup>d</sup><br>(cm <sup>3</sup> /g) | V <sub>ultra</sub> <sup>e</sup><br>(cm <sup>3</sup> /g) |
|------------------------|--------------|----------|----------|----------|----------|------------------------------------------------------|------------------------------------------------------|-----------------------------------------------------|---------------------------------------------------------|---------------------------------------------------------|
| 0                      | 33.4         | 83.23    | 12.57    | 0.01     | 0        | 1159                                                 | 975 (84)                                             | 0.58                                                | 0.13                                                    | 0.29                                                    |
| 0.5                    | 25.5         | 76.57    | 7.83     | 1.42     | 6.74     | 2230                                                 | 1926 (87)                                            | 1.11                                                | 0.63                                                    | 0.12                                                    |
| 1                      | 26.3         | 71.44    | 9.66     | 2.98     | 9.75     | 2397                                                 | 1970 (82)                                            | 1.24                                                | 0.63                                                    | 0.13                                                    |
| 2                      | 31.5         | 68.13    | 10.47    | 4.15     | 10.3     | 1926                                                 | 1539 (80)                                            | 1.04                                                | 0.49                                                    | 0.11                                                    |

<sup>a</sup> BET surface area, <sup>b</sup> micropore surface area, the values in parenthesis was the S<sub>mic</sub> / S<sub>BET</sub> and the unit was %, <sup>c</sup> total pore volume, <sup>d</sup> supermicropore volume (> 0.7 and < 2 nm), <sup>e</sup> ultramicropore volume (< 0.7 nm).

**Table S3.** Porosity, preparation condition, and elemental compositions of selected NSC materials. The activation conditions were set to be 700 °C.

| Sample | m(K <sub>2</sub> CO <sub>3</sub> )<br>/m(KSCN)<br>/m(Biomass) | N<br>(%) | S<br>(%) | S <sub>BET</sub><br>(m <sup>2</sup> /g) |
|--------|---------------------------------------------------------------|----------|----------|-----------------------------------------|
| A1     | 0/1/1                                                         | 5.03     | 10.01    | 1403                                    |
| A2     | 1/2/1                                                         | 4.15     | 10.8     | 1926                                    |
| A3     | 1/0.5/1                                                       | 1.42     | 6.74     | 2230                                    |
| A4     | 1/1/1                                                         | 2.98     | 9.75     | 2397                                    |
| A5     | 2/1/1                                                         | 2.11     | 4.04     | 2900                                    |

**Table S4.** The isothermal parameters and kinetic parameters of selected NSC materials for CAP adsorption.

| Sample | Langmuir      |                | pseudo-second-order model |                |
|--------|---------------|----------------|---------------------------|----------------|
|        | $q_m$<br>mg/g | R <sup>2</sup> | $k_2$<br>g/mg/min         | R <sup>2</sup> |
| A1     | 417           | 0.99           | 0.0003                    | 0.99           |
| A2     | 588           | 0.99           | -                         | -              |
| A3     | 625           | 0.99           | -                         | -              |
| A4     | 714           | 0.99           | 0.0002                    | 0.99           |
| A5     | 833           | 0.99           | -                         | -              |

**Table S5.** The isothermal parameters of selected NSC materials for Pb<sup>2+</sup> adsorption.

| Sample | Langmuir      |       |
|--------|---------------|-------|
|        | $q_m$<br>mg/g | $R^2$ |
| A1     | 294           | 0.97  |
| A2     | 303           | 0.99  |
| A3     | 222           | 0.99  |
| A4     | 285           | 0.99  |
| A5     | 100           | 0.99  |
